# Supplementary material for: Study on the Diffusion and Optimization of Sucrose in Gaido Seak Based on Finite Element Analysis and Hyperspectral Imaging Technology
Source: MDPI journal article supplement (doi:10.3390/foods13020249), 2024-01-12
Supplement: s1 [file s1]

## **Supplement materials**

### **Study on the diffusion and optimization of sucrose in Gaido steak based on FEA and HSI**

Wenlong Li, Yu Shi, Zhihua Li, Xiaowei Huang, Xinai Zhang, Xiaobo Zou, Xuetao Hu, Jiyong Shi\*

Agricultural Product Processing and Storage Lab, School of Food and Biological Engineering,

Jiangsu University, Zhenjiang, Jiangsu 212013, China

\*Corresponding author:

Prof. Jiyong Shi

Tel: 139 1455 1781; E-mail: [shi\\_jiyong@ujs.edu.cn](mailto:shi_jiyong@ujs.edu.cn)

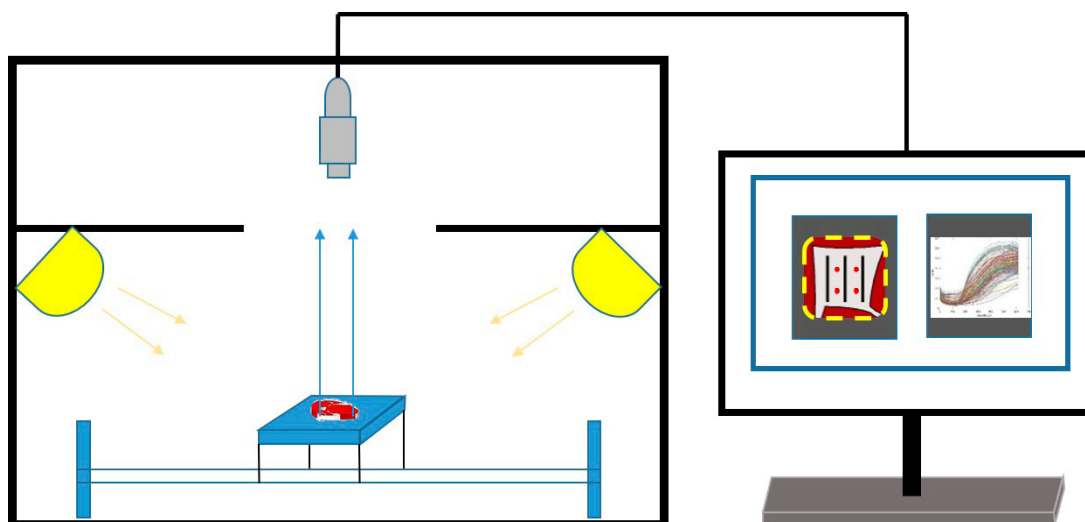

**Figure S1. Physical view of the hyperspectral image acquisition system**

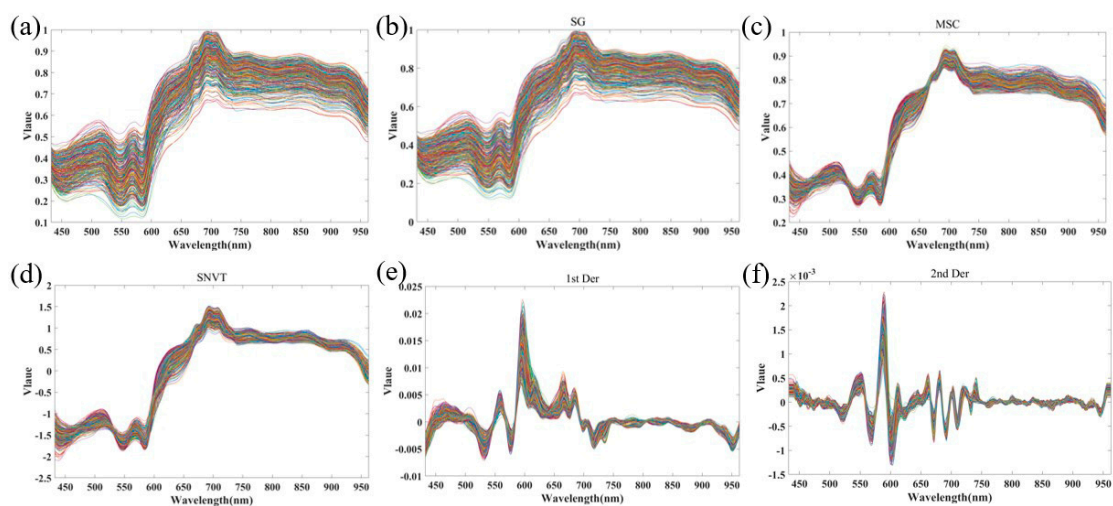

**Figure S2. (a) Raw spectra of sucrose marinated steak and (b) (c) (d) (e) (f) spectra after various pre-processing methods.**

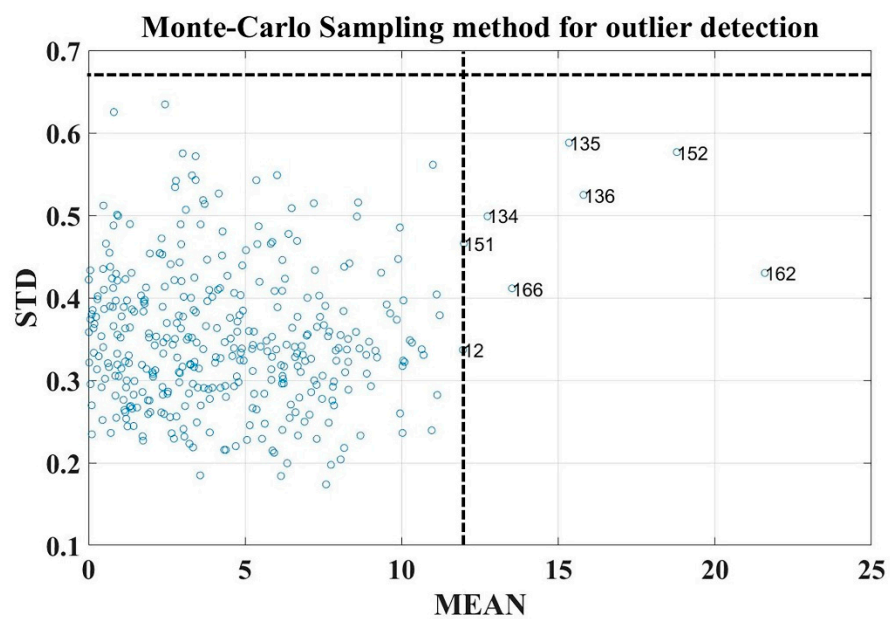

**Figure S3. Detection of outlier based on Monte Carlo method**
